# Supplementary material for: Nano-Electrochemical Characterization of a 3D Bioprinted Cervical Tumor Model
Source: MDPI journal article supplement (doi:10.3390/cancers15041327), 2023-02-19
Supplement: s1 [file s1]

# Supplementary Materials: Nano-Electrochemical Characterization of a 3D Bioprinted Cervical Tumor Model

Maila Beconi, Simona De Zio, Francesco Falciani, Marzia Santamaria, Marco Malferrari and Stefania Rapino

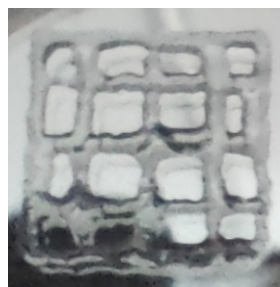

**Figure S1.** 3D bio-printed grid with the final sterile bioink, formulated with 2.5% w/v alginate, 3.3% w/v D-Mannitol, 0.19% w/v  $\text{CaCl}_2$  in bi-distilled water.

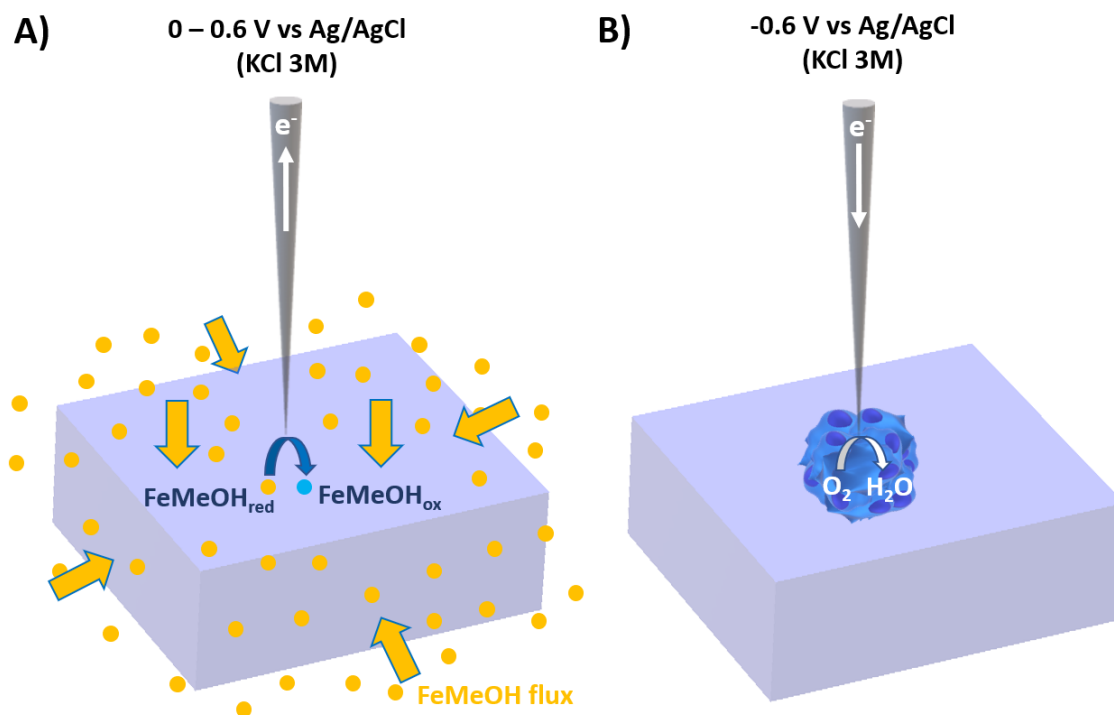

**Figure S2.** Schematic representation of SECM detection of (A) FeMeOH diffusion into 3D bio-printed constructs (B) and measurements of oxygen concentrations in HeLa spheroids.

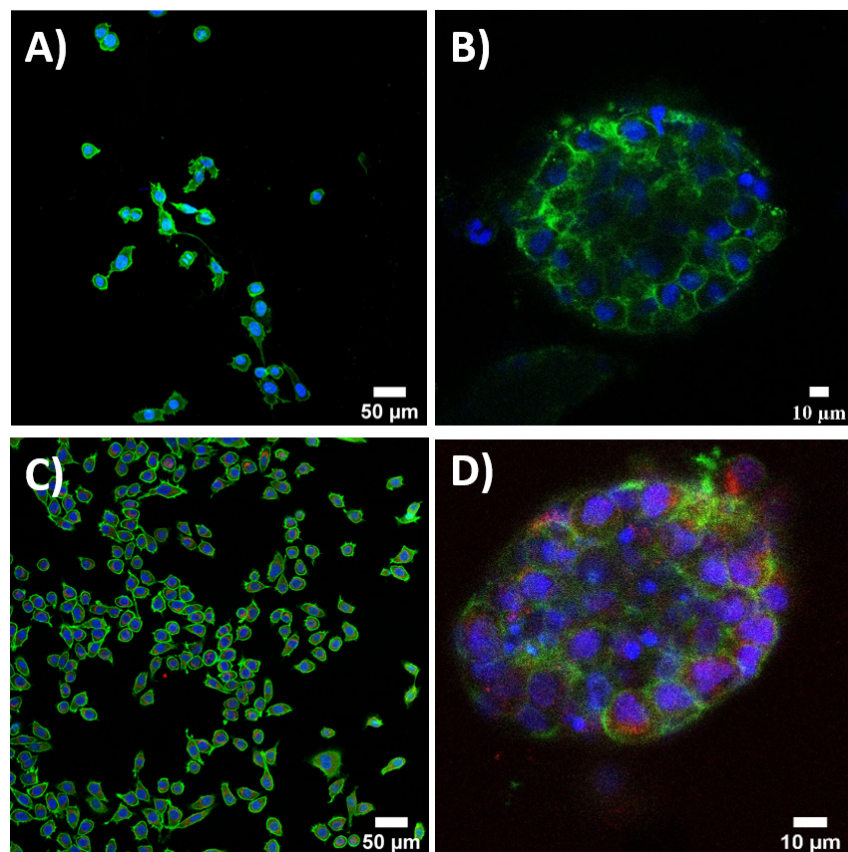

**Figure S3.** Confocal images of HeLa morphological structure in 2D and 3D. **(A,C)** Bidimensional and **(B,D)** tridimensional cultures of HeLa cells. Nuclei staining with DAPI and cytoskeleton staining with Phalloidin-FITC are shown in blue and green, respectively. E-cadherin expression is showed in **(C)** and **(B)** with red staining.

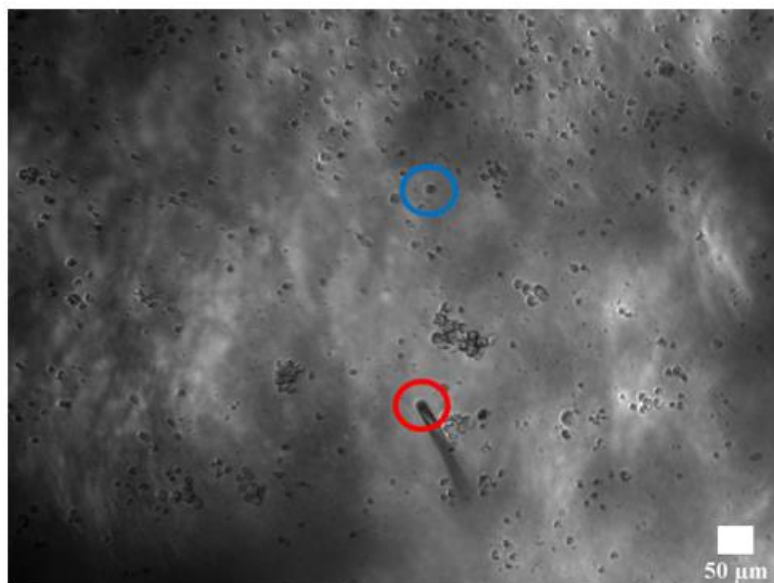

**Figure S4.** Comparison between the dimension of the employed nanoelectrode and a single HeLa cell: the red circle indicates the tip and the blue circle indicates a single HeLa cell growing in 3D alginate matrix.
